# Supplementary material
Source: MDPI journal article supplement (https://www.mdpi.com/search?q=molecules-24-04346)
Supplement: s001 [file molecules-24-04346-s001.pdf]

## Supplementary Material

# Discovery and characterisation of dual inhibitors of tryptophan 2,3-dioxygenase (TDO2) and indoleamine 2,3-dioxygenase 1 (IDO1) using virtual screening

Suat Sari <sup>1</sup>, Petr Tomek <sup>2</sup>, Euphemia Leung <sup>2,\*</sup> and Jóhannes Reynisson <sup>3,\*</sup>

<sup>1</sup> Hacettepe University, Faculty of Pharmacy, Department of Pharmaceutical Chemistry, Ankara 06100, Turkey; suat1039@gmail.com

<sup>2</sup> Auckland Cancer Society Research Centre, University of Auckland, Grafton, 1023 Auckland, New Zealand; p.tomek@auckland.ac.nz

<sup>3</sup> School of Pharmacy and Bioengineering, Keele University, Hornbeam building, ST5 5BG Staffordshire, United Kingdom

\* Correspondence: e.leung@auckland.ac.nz (E.L.); j.reynisson@keele.ac.uk (J.R.); Tel.: +44(0)1782733985 (J.R.)

## Content

|                                                                                                                                           |   |
|-------------------------------------------------------------------------------------------------------------------------------------------|---|
| 1. <b>Figure S1.</b> Structure of the active and inactive compounds of the test set.....                                                  | 2 |
| 2. <b>Figure S2.</b> The thirty structures of the virtual hits ( <b>TD01</b> to <b>TD30</b> ), which were tested for activity.....        | 3 |
| 3. <b>Figure S3.</b> The five derivatives of <b>TD05</b> ( <b>TD31</b> to <b>TD35</b> ), which were tested for activity.....              | 4 |
| 4. <b>Table S1.</b> Definition of lead-like, drug-like and Known drug space (KDS) in terms of molecular descriptors.<br>.....             | 4 |
| 5. <b>Table S2.</b> The catalogue numbers of the commercial compounds tested and their source.....                                        | 5 |
| 6. <b>Table S3.</b> The single point and corrected zero point vibrational energies (ZPE) of the optimized ligands in hartrees (a.u.)..... | 6 |

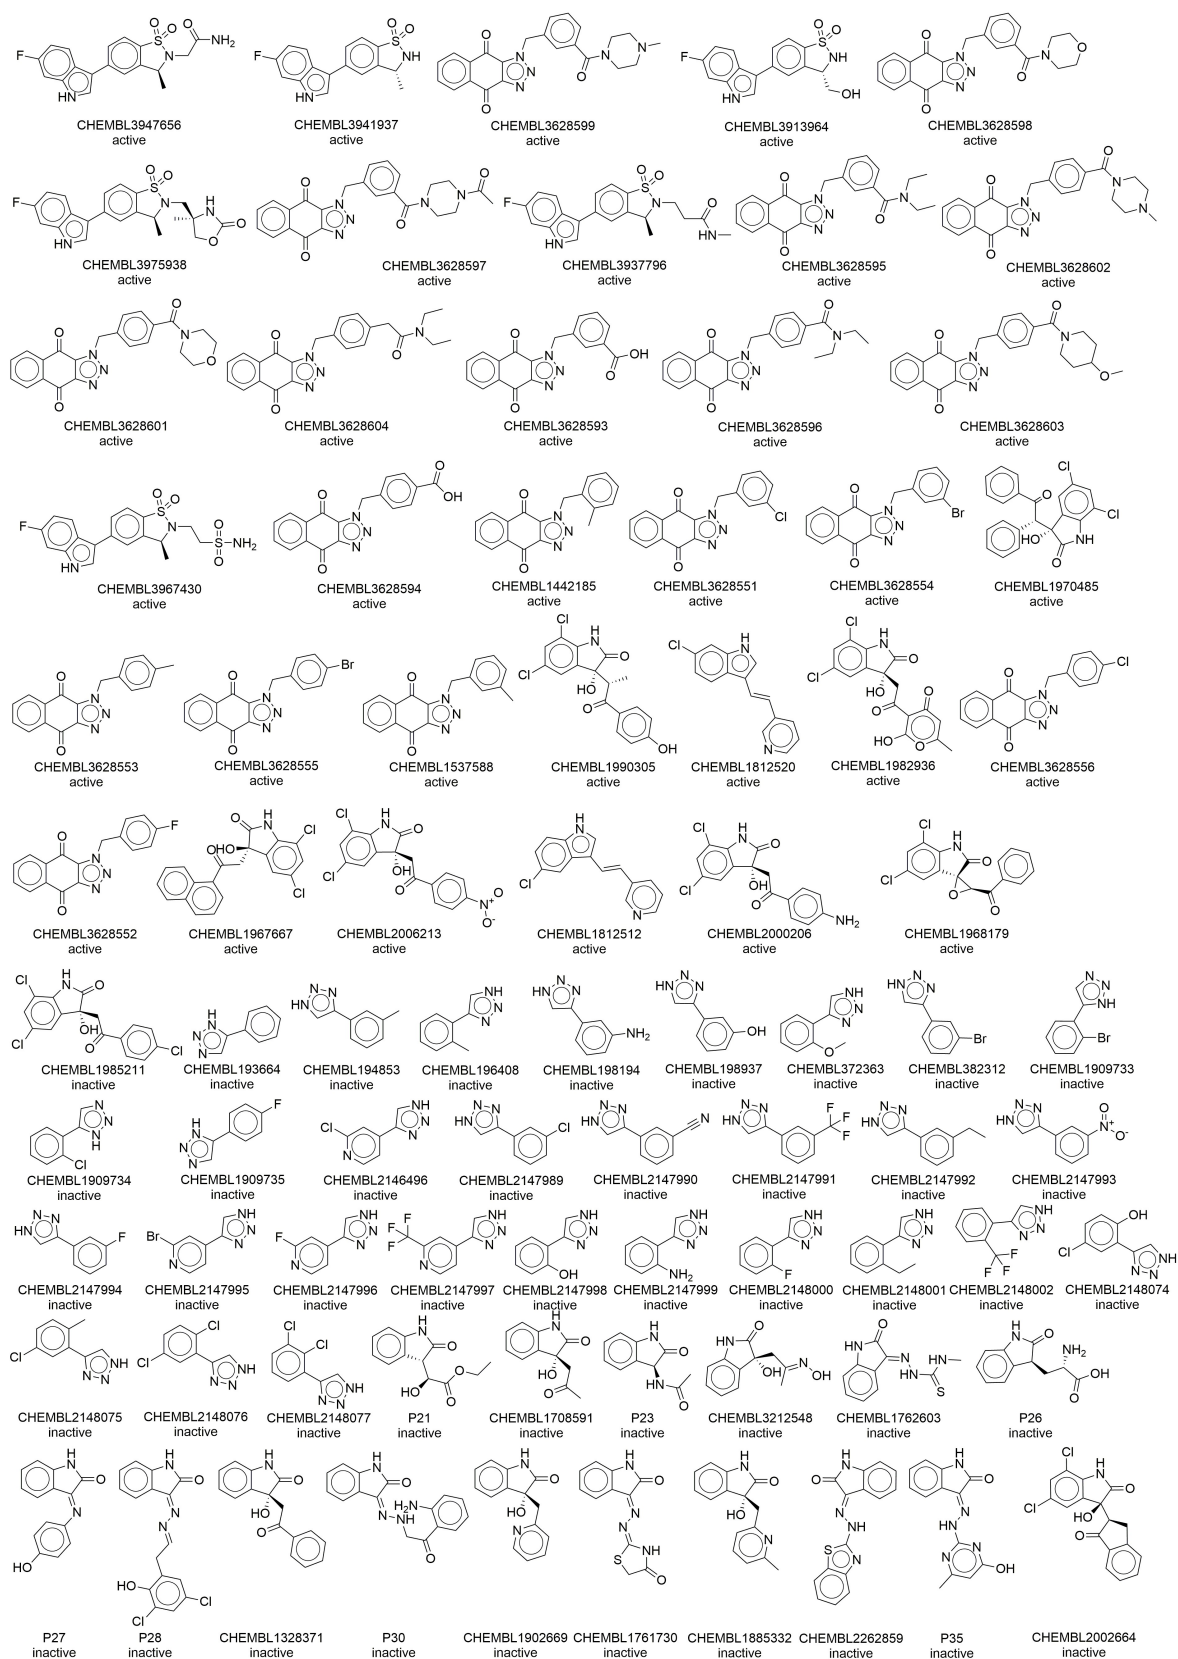

**Figure S1.** Structure of the active and inactive compounds of the test set (P21, P23, P26, P27, P28, P30, and P35 were obtained from the study of Pantouris et al. 2016).

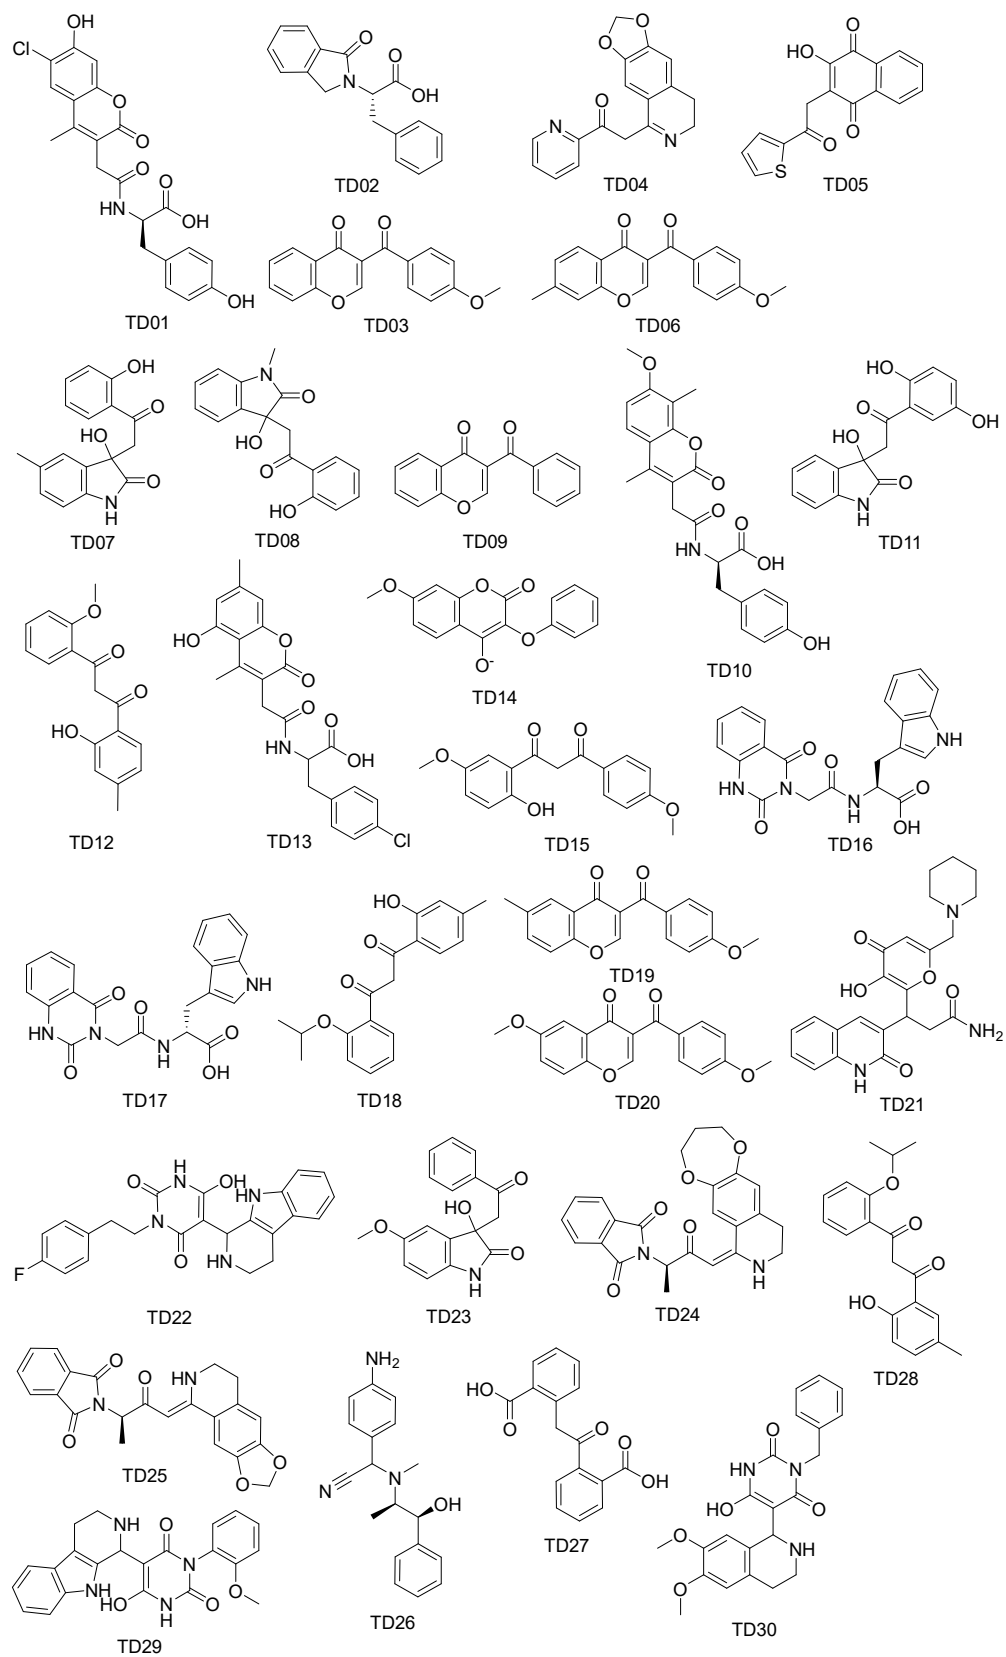

**Figure S2.** The thirty structures of the virtual hits (TD01 to TD30), which were tested for activity.

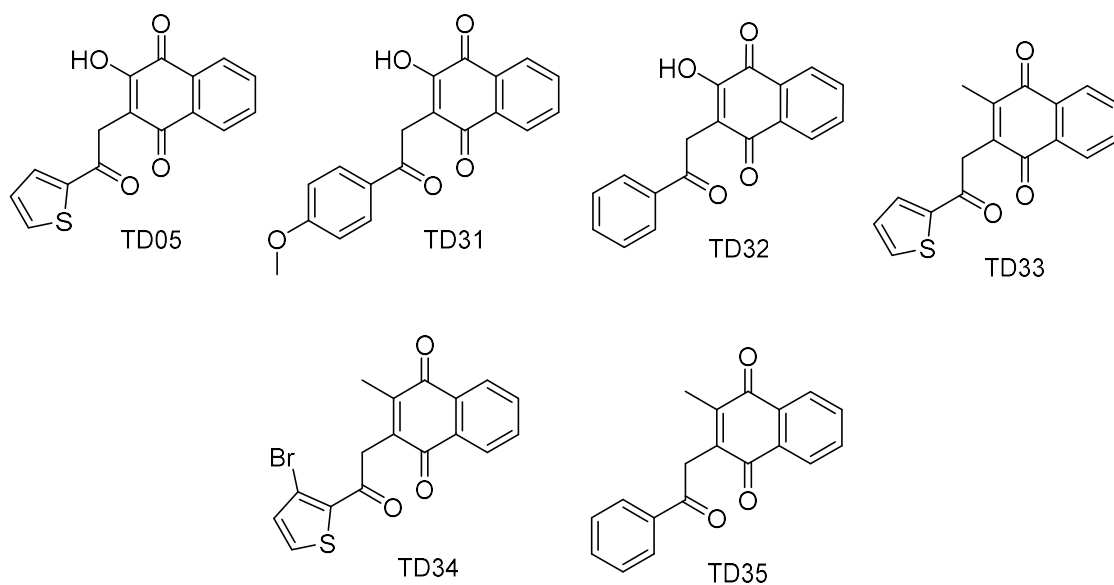

**Figure S3.** The five derivatives of TD05 (TD31 to TD35), which were tested for activity.

**Table S1.** Definition of lead-like, drug-like and Known drug space (KDS) in terms of molecular descriptors. The values given are the maxima for each descriptor for the volumes of chemical space used.

|                                             | Lead-like Space | Drug-like Space | Known Drug Space |
|---------------------------------------------|-----------------|-----------------|------------------|
| Molecular weight ( $\text{g mol}^{-1}$ )    | 300             | 500             | 800              |
| Lipophilicity (Log P)                       | 3               | 5               | 6.5              |
| Hydrogen bond donors (HD)                   | 3               | 5               | 7                |
| Hydrogen bond acceptors (HA)                | 3               | 10              | 15               |
| Polar surface area ( $\text{\AA}^2$ ) (PSA) | 60              | 140             | 180              |
| Rotatable bonds (RB)                        | 3               | 10              | 17               |

**Table S2.** The catalogue numbers of the commercial compounds tested and their source.

| <b>TDO code</b> | <b>compound name</b> | <b>Supplier</b> |
|-----------------|----------------------|-----------------|
| TD_001          | STOCK1N-52742        | InterBioScreen  |
| TD_002          | STOCK1N-74210        | InterBioScreen  |
| TD_003          | STOCK1N-19585        | InterBioScreen  |
| TD_004          | STOCK1N-65400        | InterBioScreen  |
| TD_005          | STOCK1N-45023        | InterBioScreen  |
| TD_006          | STOCK1N-88445        | InterBioScreen  |
| TD_007          | STOCK1N-29263        | InterBioScreen  |
| TD_008          | STOCK1N-28512        | InterBioScreen  |
| TD_009          | STOCK1N-20765        | InterBioScreen  |
| TD_010          | STOCK1N-41695        | InterBioScreen  |
| TD_011          | STOCK1N-14647        | InterBioScreen  |
| <b>TD_012</b>   | STOCK1N-83399        | InterBioScreen  |
| TD_013          | STOCK1N-51797        | InterBioScreen  |
| TD_014          | STOCK1N-09393        | InterBioScreen  |
| TD_015          | STOCK1N-21184        | InterBioScreen  |
| TD_016          | STOCK1N-57094        | InterBioScreen  |
| TD_017          | STOCK1N-66050        | InterBioScreen  |
| <b>TD_018</b>   | STOCK1N-82503        | InterBioScreen  |
| TD_019          | STOCK1N-20871        | InterBioScreen  |
| TD_020          | STOCK1N-89459        | InterBioScreen  |
| TD_021          | STOCK1N-90415        | InterBioScreen  |
| TD_022          | STOCK1N-55924        | InterBioScreen  |
| TD_023          | STOCK1N-89920        | InterBioScreen  |
| TD_024          | STOCK1N-88688        | InterBioScreen  |
| TD_025          | STOCK1N-89918        | InterBioScreen  |
| TD_026          | STOCK1N-27918        | InterBioScreen  |
| TD_027          | STOCK1N-09308        | InterBioScreen  |
| TD_028          | STOCK1N-77813        | InterBioScreen  |
| TD_029          | STOCK1N-57965        | InterBioScreen  |
| TD_030          | STOCK1N-31554        | InterBioScreen  |
| TD_031          | 5169036              | ChemBridge      |
| TD_032          | 5477691              | ChemBridge      |
| TD_033          | 11K-929              | Key Organics    |
| <b>TD_034</b>   | 11K-930              | Key Organics    |
| TD_035          | 10E-980              | Key Organics    |

**Table S3.** The single point and corrected zero point vibrational energies (ZPE) of the optimized ligands in hartrees (a.u.).

| Systems    | Energy/a.u.  | ZPE/a.u. [a] |
|------------|--------------|--------------|
| TD12       | -958.6329072 | 0.286727784  |
| Ox.        | -958.3566669 | 0.286534645  |
| Red.       | -958.6515898 | 0.282028727  |
| Enol taut. | -958.6305058 | 0.287089552  |
| TD18       | -1037.292005 | 0.34149783   |
| Ox.        | -1037.017137 | 0.341247828  |
| Red.       | -1037.30965  | 0.336714458  |
| Enol taut. | -1037.289583 | 0.341853715  |
| TD34       | -3852.740195 | 0.231744011  |
| Ox.        | -3852.427131 | 0.228364572  |
| Red.       | -3852.810506 | 0.229085166  |

[a] Corrected values (Wong).
